# Supplementary material for: Fruit trait and seed size measurements and molecular phylogenetic analysis of Kazakhstan melon as an example of melon development on the Silk Road
Source: Research Square preprint supplement (doi:10.21203/rs.3.rs-1439317/v1), 2022-03-16
Supplement: Supplementary file 2 [file 76566e0ce3dbd3f77d5df999.xlsx]

## Sheet: Tab1 Morpho data
Table 1 Average fruit phenotypic traits in Kazakh melon groups and unknown melon
Melon Group1	No of accessions		Fruit weight3 (kg)	Fruit shape (FL/FD)	Fruit length (cm): FL	Fruit width (cm): FD	Pulp thickness (cm)	SSC (ºBrix)	Seed length (mm)	Seed width (mm)
AmeriANV	6		6.60 ± 2.86	2.00 ± 0.19	36.58 ± 5.24	18.38 ± 3.02	6.08 ± 1.43	11.20 ± 1.46	12.31 ± 0.80	5.57 ± 0.34
BasvaldyANV	9		4.24 ± 2.18	1.42 ± 0.16	24.97 ± 3.94	17.59 ± 2.57	5.12 ± 1.12	10.06 ± 1.59	12.82 ± 0.66	5.73 ± 0.45
Cantalupensis	3		2.60 ± 0.85	0.85 ± 0.18	14.67 ± 3.40	17.33 ± 1.26	3.73 ± 0.75	10.23 ± 4.02	13.64 ± 0.96	5.74 ± 0.64
CassabaANV	7		4.23 ± 1.14	0.98 ± 0.14	19.64 ± 2.59	20.36 ± 3.06	5.31 ± 1.11	10.83 ± 2.94	12.63 ± 1.18	5.70 ± 0.43
ChandalakANV	5		2.18 ± 1.51	1.00 ± 0.08	14.84 ± 4.07	14.80 ± 3.29	4.30 ± 1.71	14.34 ± 0.90	11.15 ± 0.85	5.07 ± 0.44
Guliabi	2		5.50 ± 3.96	1.36 ± 0.07	26.25 ± 5.30	19.50 ± 4.95	5.50 ± 1.41	9.10 ± 4.38	13.01 ± 0.87	6.06 ± 0.28
Kara guliabiANV	5		7.02 ± 3.47	1.58 ± 0.13	32.44 ± 5.31	20.48 ± 2.90	5.82 ± 0.73	9.48 ± 1.80	12.49 ± 1.08	5.38 ± 0.21
Sary guliabiANV	5		3.48 ± 0.76	1.24 ± 0.12	22.90 ± 2.25	18.40 ± 0.65	4.86 ± 0.43	8.62 ± 1.53	12.55 ± 1.23	5.54 ± 0.41
ZardANV	15		4.03 ± 1.80	1.42 ± 0.28	24.67 ± 6.61	17.40 ± 2.88	4.92 ± 0.89	11.71 ± 1.67	11.89 ± 1.09	5.19 ± 0.47
Other three groups2	5		4.62 ± 2.04	1.13 ± 0.13	21.70 ± 3.49	20.16 ± 3.60	5.20 ± 0.58	9.96 ± 1.24	13.14 ± 0.92	5.98 ± 0.28
Unknown melonANV	23		3.56 ± 1.33	1.63 ± 0.54	25.93 ± 6.59	16.72 ± 3.63	4.34 ± 0.73	11.11 ± 2.01	12.77 ± 1.18	5.61 ± 0.59
Agrestis	2		0.05 ± 0.00	1.54 ± 0.24	5.75 ± 0.35	3.75 ± 0.35	0.50 ± 0.00	0.50 ± 0.00	5.76 ± 0.05	3.07 ± 0.11
Total/Mean	87		4.08 ± 2.20	1.42 ± 0.42	24.32 ± 7.69	17.52 ± 3.89	4.90 ± 1.08	10.72 ± 2.48	12.35 ± 1.51	5.48 ± 0.63
CV (%)			*53.97	29.98*	**31.63	*22.20	22.0414	23.09*	12.1921	11.4706
SSbetween			107.26	5.54191	1834.91	158.762	23.2062	111.862	16.9255	3.48*
SSwithin			230.746	8.35548	2066.29	639.061	65.093	236.74	76.0236	15.5805
F value (df = 7, 67)3			4.45***	6.44***	8.50***	2.38*	3.41**	4.52***	2.13*	2.14*
1ANOVA was conducted for seven melon groups, as indicated by the superscript "ANV". The coefficient of variance is abbreviated as "CV". "SSbetween" and "SSwithin" indicate the sum of squares between and within groups, respectively. 2The other three groups include groups Inodorus and Zurbek and Subgroup Kalaysan. 3The numerical value indicates the mean ± standard deviation of phenotypic traits. Si…

## Sheet: Tab2 Gene stat
Table 2 Statistical analysis of genetic variation in RAPD and SSR markers for Kazakh and reference melon accessions
Marker name	Kazakhstan (N = 89)						Reference (N = 113)
	Na	Ne	Ho	He	PIC		Na	Ne	Ho	He	PIC
RAPD
A07-872	1	1	-	0	0		2	1.59433	-	0.37278	0.338039
A20-1100	2	1.75827	-	0.431261	0.338268		2	1.29911	-	0.23024	0.216988
A20-800	2	1.04595	-	0.0439302	0.0429653		2	1.36581	-	0.267833	0.2499
A22-1520	1	1	-	0	0		2	1.36581	-	0.267833	0.2499
A23-1200	2	1.22219	-	0.181789	0.165266		2	1.95574	-	0.488684	0.428981
A26-1400	2	1.02272	-	0.0222273	0.0219803		2	1.76734	-	0.434174	0.387047
A39-2027	2	1.87479	-	0.46661	0.357747		2	1.99859	-	0.499648	0.437236
A41-930	2	1.1695	-	0.144928	0.134426		2	1.21321	-	0.175746	0.168024
A57-800	2	1.09391	-	0.0858408	0.0821565		2	1.78712	-	0.440439	0.391943
B15-600	2	1.11863	-	0.106048	0.100425		2	1.66155	-	0.398155	0.358523
B68-1078	2	1.11863	-	0.106048	0.100425		2	1.80634	-	0.446392	0.396575
B71-1220	2	1.04595	-	0.0439302	0.0429653		2	1.96537	-	0.49119	0.430873
B84-700	2	1.14383	-	0.125749	0.117843		2	1.99984	-	0.499961	0.437471
B84-600	2	1.11863	-	0.106048	0.100425		2	1.99859	-	0.499648	0.437236
B84-550	2	1.64986	-	0.393887	0.316313		2	1.78712	-	0.440439	0.391943
B86-1350	1	1	-	0	0		2	1.0545	-	0.0516902	0.0510222
B96-850	2	1.14383	-	0.125749	0.117843		2	1.78712	-	0.440439	0.391943
B96-750	2	1.27655	-	0.216646	0.193178		2	1.96537	-	0.49119	0.430873
B99-1400	2	1.04595	-	0.0439302	0.0429653		2	1.63936	-	0.39001	0.351983
C00-1350	2	1.02272	-	0.0222273	0.0219803		2	1.50277	-	0.334561	0.306578
SSR
BR12	4	2.39776	0.123596	0.582941	0.532392		4	2.8169	0	0.645003	0.592161
BR22	3	1.74126	0.0674157	0.425699	0.352246		6	3.52832	0	0.716576	0.680196
BR53	4	2.72903	0.213483	0.633566	0.573816		4	2.42803	0	0.588144	0.531377
BR83	3	1.49425	0	0.330769	0.288956		5	2.48183	0	0.59707	0.566578
BR120	2	1.20885	0.0561798	0.172776	0.15785		5	2.35287	0	0.574987	0.53467
CMN4-07	4	2.14603	0	0.53402	0.46897		7	4.22395	0	0.763334	0.727226
CMN4-40	2	1.13343	0.011236	0.117729	0.114115		6	2.30503	0	0.566486	0.524738
CMN08-22	2	1.1566	0.011236	0.135393	0.126228		2	1.72624	0	0.420702	0.332207
CMN08-90	4	1.99446	0.0786517	0.498611	0.449124		4	1.55891	0	0.358526	0.332165
CMN21-41	3	1.55649	0	0.357531	0.30771		4	2.2234	0	0.550238	0.505434
CMN22-16	2	1.99773	0.0449438	0.499432	0.374716		5	2.50029	0	0.600362	0.552496
Mean
RAPD	1.85	1.1936	-	0.133342	0.114859		2	1.67575	-	0.383053	0.342654
SSR	3	1.77781	0.0551583	0.389861	0.340557		4.72727	2.55871	0	0.58013	0.534477
1Ne = Number of effective alleles, Ho = Observed heterozygosity, He = Expected heterozygosity.
